# Supplementary material for: When Should Governments Invest More in Nudging? Revisiting Benartzi et al. (2017)
Source: publisher site journal article supplement (doi:10.1515/rle-2021-0048), 2022-11-01
Supplement: Supplementary file 1 [file j_rle-2021-0048_suppl.docx]

Online Appendix: Unreviewed

*When Should Governments Invest More in Nudging?*

*Revisiting Benartzi et al. (2017)*

Avishalom Tor and Jonathan Klick

**Methodology**

This appendix details the calculations performed in the paper. For simplicity of exposition, these calculations also track Benartzi et al.’s (2017) analysis of the underlying studies to the extent possible. All relevant figures (including those that the Article converted to 2015 U.S. dollars) have been further updated to 2021 U.S. dollars.

**Calculations**

**Table 1: Illustrative Cost-Effectiveness of Policies Targeting Energy Conservation**

**Allcott, H. (2011). Social norms and energy conservation. *Journal of Public Economics, 95,* 1082-1095.**

*Panel A: Uncorrected Cost-Effectiveness*

**Implementation Costs (per customer):** Benartzi et al. (2017) update the reported implementation cost of Allcott (2011) to 2015 dollars. We further update this figure by a factor of 1.17 to report in 2021 dollars

.

**Effectiveness (average usage reduction per customer):** Allcott (2011) reported an ATE with an unweighted mean of 2.03%. This amounts to a usage reduction of 0.62 kWh per day for a yearly average usage reduction of 226.3 kWh.

**Uncorrected CE (per kWh saved):** Dividing the implementation cost by effectiveness, yielding an uncorrected CE of $0.04.

*Panel B: Corrected Cost-Effectiveness*

Implementation costs and effectiveness are already reported in *Panel A* above.

**Consumer Costs [CCs] (per customer):** The two alternative estimates follow Allcott and Kessler’s (2019) assessment of a natural gas HER program, which put these costs at $2.46 or 43% of the households’ retail savings from reducing natural gas consumption and further considered their applicability to a typical electricity HER program in their Online Appendix.

The low CCs estimate of $2.46 assumes that the CCs of Allcott’s (2011) annual electricity HERs are identical to Allcott and Kessler's (2019) estimates of natural gas HERs’ CCs over one heating season (243 days) and that the consumer costs of HERs (or similar instruments) are primarily their direct consumer costs.

The alternative CC estimate of $14.60 uses Allcott and Kessler's (2019) estimate of the proportion of CCs to consumer benefits of natural gas HERs as 43% of average retail savings, assuming that electricity HERs (or similar instruments) entail not only direct costs but also the opportunity costs of energy saving behavior that vary with policy effectiveness.

**Consumer Retail Electricity Savings**: The EIA reports the 2011 retail price as 11.51 cents/kWh or ~$0.13/kWh in 2015 dollars and ~$0.15/kWh in 2015 dollars. Multiplying this cost by effectiveness (consumers’ lower energy use) yields consumer retail electricity savings of $33.95.

Hence, the alternative CCs estimate of Allcott’s (2011) HERs is:

**Retailer Net Revenue Loss [RNRL] (per customer):** Since Allcott (2011) does not report RNRL data, we follow Allcott and Kessler’s (2019) estimated RNRL at 25% of consumers’ retail electricity savings. Applying this estimate here yields:

**Corrected CE I [including CCs and RNRL] (per kWh saved)**

The corrected CE I figure of $0.09 is obtained by including CCs of $2.46 and RNRL of $8.49 with the implementation cost of $9.72.

The corrected CE I figure of $0.14 is obtained by including the CCs of $14.60 and RNRL of $8.49 with the implementation cost of $9.72.

**Non-Transfer Implementation costs (per customer):** The implementation costs remain the same since the intervention did not involve transfers.

**Corrected CE II [also excluding transfers] (per kWh saved):** Because implementation costs remain the same, Corrected CE II is the same as Corrected CE I.

**Asensio, O. I., & Delmas, M. A. (2015). Nonprice incentives and energy conservation. *Proceedings of the National Academy of Sciences of the United States of America, 112*, E510-E515.**

*Panel A: Uncorrected Cost-Effectiveness*

According to Benartzi et al. (2017), Asensio & Delmas (2015) reported their implementation costs as $3019 per household in 2015 dollars, which yields $3532.23 in 2021 dollars.

**Effectiveness (average usage reduction per customer):** The effectiveness calculation below tracks the methodology employed by Benartzi et al. (2017), who extrapolate from the data Asensio & Delmas (2015) report for the 100-day period of that study (assuming that the impact of the nudge decayed linearly over the remainder of a year) to estimate a total of 149.8 kWh saved per household.

**Uncorrected CE (per kWh saved):** Calculated by dividing the implementation cost by effectiveness, yielding an uncorrected CE of $23.58.

*Panel B: Corrected Cost-Effectiveness*

Implementation costs and effectiveness are already reported in *Panel A* above.

**Consumer Costs [CCs] (per customer):** SinceAsensio and Delmas (2015) do not provide CCs data, we follow here the same methodology as for Allcott (2011) above.

The low CCs estimate is $2.46.

The high CC estimate is calculated as 43% of the reported average retail savings.

**Consumer Retail Electricity Savings**: According to their Supporting Information, the Asensio and Delmas (2015) study took place in California between late 2011 and July 2012. Since we follow Benartzi et al.’s (2017) extrapolation of the study’s effectiveness data over a full year, we estimate consumer retailer electricity savings using California’s average electricity retail price for 2012, which the EIA reports as $0.14/kWh in 2012 dollars or $0.16/kWh in 2021 dollars. Multiplying this cost by effectiveness (consumers’ lower energy use) yields consumer retail electricity savings of $23.97.

Hence, the alternative CCs estimate for Asensio and Delmas’s (2015) nudge is:

**Retailer Net Revenue Loss [RNRL] (per customer):** Asensio and Delmas (2015) do not report RNRL data. Because this study took place in California, we use Baskette et al.’s (2006) modal estimate of 42% avoidable operating costs across all California DSM programs in 2004, which yields a modal RNRL of 58% of retail electricity cost savings at $23.97, or $13.90.

**Corrected CE I [including CCs and RNRL] (per kWh saved):**

The Corrected CE I figure of $23.69 is obtained by including the CC of $2.46 and RNRL $13.90 along with the implementation cost.

The Corrected CE I figure of $23.74 is obtained by including the CC of $10.31 and RNRL $13.90 along with the implementation cost.

**Non-Transfer Implementation costs (per customer):** The implementation costs remain the same since the intervention did not involve transfers.

**Corrected CE II [also excluding transfers] (per kWh saved):** Because implementation costs remain the same, Corrected CE II is the same as Corrected CE I.

**Ito, K. (2015). Asymmetric incentives in subsidies: Evidence from a large-scale electricity rebate program. *American Economic Journal: Economic Policy, 7,* 209-237.**

*Panel A: Uncorrected Cost-Effectiveness*

The reported **administrative costs** were the same for both customer categories at $1.15 per customer in 2005 dollars, updated to $1.39 in 2015 dollars in Benartzi et al. (2017), and to $1.63 in 2021 dollars here.

The **rebate cost** is different for coastal and inland customers. All figures are taken from Benartzi et al. (2017) or, where unavailable, from Table 8 of Ito (2015).

Overall: $4.33

Note: Benartzi updates 2005 to 2015 using a factor of 1.22.

Coastal: $4.18

Inland: $5.97

The **total implementation costs** are the sum of the administration and rebate costs.

Overall: $4.33 + $1.63= $5.96

Coastal: $4.18 + $1.63 = $5.81

Inland: $5.97 + $1.63 = $7.60

**Effectiveness (average usage reduction per customer):** The figures used below are taken from Table 8 of Ito (2015), dividing the estimated reduction by the number of customers for each respective area studied.

Overall: 17.34

Coastal: 3.11

Inland: 169.15

*Panel B: Corrected Cost-Effectiveness*

Implementation costs and effectiveness are already reported in *Panel A* above.

**Uncorrected CE (per kWh saved):** The cost effectiveness figure is found by dividing the implementation cost by the effectiveness, yielding the following CEs:

Overall: 0.34

Coastal: 1.87

Inland: 0.04

**Consumer Costs [CCs] (per customer):** SinceIto (2015) does not provide CC data, we follow the methodology of older studies cited in Arimura et al. (2012) and used by Allcott and Greenstone (2012), which estimates these costs at 70% of program implementation costs.

Overall: $4.17

Coastal: $4.07

Inland: $5.32

**Retailer Net Revenue Loss [RNRL] (per customer):** Ito (2015) does not report RNRL data. Because the study took place in California, we use Baskette et al.’s (2006) modal estimate of 42% avoidable operating costs across all California DSM programs in 2004, with its implied modal RNRL of 58% of electricity retail cost savings.

**Consumer Retail Electricity Cost Savings**: Ito (2005) estimated the marginal cost of electricity in California in 2005 at 13.37 c/kWh or $0.19/kWh in 2021 dollars.

Overall:

Coastal:

Inland:

Applying the modal RNRL of 58% of retail cost savings thus yields:

Overall: $1.91

Coastal: $0.34

Inland: $18.64

**Corrected CE I [including CCs and RNRL] (per kWh saved):** The Corrected CE I figures are calculated by adding the CCs and RNRL to the implementation cost and dividing by effectiveness.

Overall: $0.69/kWh

Coastal: $3.29/kWh

Inland: $0.19/kWh

**Non-Transfer Implementation costs (per customer):** Includes only the administrative cost reported by Ito (2015) of $1.63.

**Corrected CE II (per kWh saved):** Including only the non-transfer implementation cost of $1.63 plus CCs and RNRL.

Overall, $0.44

Coastal, $1.94

Inland, $0.15

**Arimura, T. H., Li, S., Newell, R. G., & Palmer, K. (2012). Cost-effectiveness of electricity energy efficiency programs. *Energy Journal, 33*, 63-99.**

*Panel A: Uncorrected Cost-Effectiveness*

Arimura et al. (2012) report **mean DSM spending per customer** at $9.41, which Benartzi et al. (2017) update to $10.83 in 2015 dollars. Updating the figure to 2021 dollar yields $12.67.

**Effectiveness (average usage reduction per customer) and Uncorrected CE (per kWh saved):** Arimura et al. (2012) calculate cost effectiveness as $0.05/kWh saved, which Benartzi et al. (2017) update to $0.071/kWh saved in 2015 dollar. We update this figure to 2021 below.

For consistency, we retain Benartzi et al.’s (2017) calculation of the implied average usage reduction per customer (effectiveness) as 152.54 , which yields an uncorrected CE of $0.08.

*Panel B: Corrected Cost-Effectiveness*

Implementation costs and effectiveness are already reported in *Panel A* above.

**Consumer Costs [CCs] (per customer):** Arimura et al. (2012) do not report CC data. We therefore follow use the methodology of the older studies cited by Arimura et al. (2012) and followed by Allcott and Greenstone (2012), which estimate these costs at 70% of DSM program costs.

**Retailer Net Revenue Loss [RNRL] (per customer):** Arimura et al. (2012) do not report RNRL. We therefore follow Allcott and Kessler’s (2019) estimated RNRL of 25% of retail electricity cost savings.

**Corrected CE I [including CCs and RNRL] (per kWh saved):** The Corrected CE I found by adding CCs and RNRL to implementation cost and dividing by effectiveness.

**Non-Transfer Implementation costs (per customer):** For consistency, we apply Ito’s (2015) estimated non-transfer implementation costs at 27% of DSM spending. This yields an estimated cost of $3.42.

**Corrected CE II [also excluding transfers] (per kWh saved):** The Corrected CE II figures substitute the non-transfer implementation cost of $3.42 for implementation costs.

**Table 2: Illustrative Corrected Cost-Effectiveness of Policies Targeting Retirement Savings**

**Carroll, G. D., Choi, J. J., Laibson, D., Madrian, B. C., & Metrick, A. (2009). Optimal defaults and active decisions. *Quarterly Journal of Economics, 124*, 1639-1674.**

**Implementation Costs (per affected individual):** Benartzi et al. (2017) estimate these at $2.00 for placing the enrollment form in the information packet for new employees and then following up by phone with the 5% of employees that did not return the form as instructed. This figure is updated to $2.34 in 2021 dollars.

**Effectiveness (change in annual contributions per affected individual):** Carroll et al. (2009)’s nudge increased average contribution rate by about 1% of pay. Benartzi et al. (2017) used an annual salary of $20,000 in 2015 dollars to find that the nudge caused a contribution increase of $200 per employee (a conservative estimate as the original study’s median income was $30,000 in 1998 dollars). The effectiveness figure, updated to 2021 dollars is $234.

**Uncorrected CE (per $1 change in contributions):** The uncorrected CE is found by dividing the implementation cost by the effectiveness, which yields $0.01.

**Illustrative Non-Transfer Implementation Costs (per affected individual):** Because this nudge did not include a resource transfer, the non-transfer implementation cost is the same $2.34.

**Corrected CE (excluding transfers) (per $1 change in contributions):** Because this nudge did not contain a resource transfer, the corrected CE remains unchanged at $0.01.

**Chetty, R., Friedman, J. N., Leth-Petersen, S., Nielsen, T. H., & Olsen, T. (2014). Active vs. passive decisions and crowd-out in retirement savings accounts: Evidence from Denmark. *Quarterly Journal of Economics, 129*, 1141-1219.**

**Implementation Costs (per affected individual):** Benartzi et al. (2017) found the government revenue change for the subsidy was DKr 883 which they convert using an exchange rate of 6.5:1 and update to $195 in 2015 dollars. The updated implementation cost is -$228 in 2021 dollars.

**Effectiveness (change in annual contributions per affected individual):** Chetty et al. (2014) found that capital pension contributions fell by DKr 2,449, which Benartzi et al. (2017) convert to -$540 and we update to $631.80 in 2021 USD.

**Uncorrected CE (per $1 change in contributions):** The uncorrected CE is found by dividing the implementation cost of $228 by the effectiveness of (632), yielding a CE of $0.36.

**Illustrative Non-Transfer Implementation Costs (per affected individual):** Excluding the transfer of $228.15 in taxes from affected taxpayers to the Danish government, for illustrative purposes, we estimate the non-transfer implementation costs at $2.00.

**Corrected CE (excluding transfers) (per $1 change in contributions):** Given the illustrative non-transfer implementation costs, the corrected CE is $0.003.

**Duflo, E., & Saez, E. (2003). The role of information and social interactions in retirement plan decisions: Evidence from a randomized experiment. *Quarterly Journal of Economics, 118*, 815-842.**

**Implementation Costs (per affected individual):** Duflo and Saez (2003) report implementation costs in their conclusion, which Benartzi et al. (2017) update to $4.04 in 2015 dollars, and we update to $4.73 in 2021 dollars.

**Effectiveness (change in annual contributions per affected individual):** Duflo and Saez (2003) report the effectiveness to be a $175,000 increase in savings from 4,000 employees. Benartzi et al. (2017) update the per-employee effectiveness to $58.95 in 2015 dollars, which we update to $68.97 in 2021 dollars.

**Uncorrected CE (per $1 change in contributions):** The uncorrected CE is the implementation costs divided by effectiveness, which is $0.07.

**Illustrative Non-Transfer Implementation Costs (per affected individual):** We estimate the non-transfer implementation cost of the reminder letter sent to half employees to be $2 per letter which becomes $1 per employee.

**Corrected CE (excluding transfers) (per $1 change in contributions):** With the non-transfer implementation cost at only $1.00, the corrected CE is approximately $0.01.

**Duflo, Esther, William Gale, Jeffrey Liebman, Peter Orszag, and Emmanuel Saez. 2006. “Savings Incentives for Low- and Middle-Class Families: Evidence from a Field Experiment with H&R Block,” 121 *Quarterly Journal of Economics* 1311–1346.**

**Implementation Costs (per affected individual):** Duflo et al. (2006) involved a program offering matching incentives of 20% or 50% IRA contributions. Individuals with the 20% match required $13.70 in matching funds, which Benartzi et al. (2017) updated to $16.70 in 2015 dollars and we update to $19.54 in 2021 dollars.

Individuals offered the 50% match received $67.40 more in matching funds, which Benartzi et al. (2017) updated to $82.40 in 2015 dollars and we update to $96.41 in 2021 dollars.

**Effectiveness (change in annual contributions per affected individual):**

Individuals receiving the 20% match had a total additional contribution of $76.6, which Benartzi et al. (2017) updated to $93.6 in 2015 dollars and we update to $109.51 in 2021 dollars.

Individuals receiving the 50% match had a total additional contribution of $200.1, which Benartzi et al. (2017) updated to $244.5 in 2015 dollars and we update to $286.07 in 2021 dollars.

**Uncorrected CE (per $1 change in contributions):**

The uncorrected CE for the 20% match is found by dividing the implementation cost by the effectiveness, yielding a result of $0.18.

The uncorrected CE for the 50% match is found by dividing the implementation cost by the effectiveness, yielding a result of $0.34.

**Illustrative Non-Transfer Implementation Costs (per affected individual):** Because the matching expenditures are transfers, they are excluded from the implementation cost here. We estimate the non-transfer implementation costs, including specialized training sessions, materials, and tax-preparation software modifications, at $5.00 per affected individual for both the 20% and 50% matches.

**Corrected CE (excluding transfers) (per $1 change in contributions):** The corrected CE, using the $5.00 implementation cost, are $0.05 and $0.02 for the 20% and 50% matches, respectively.

**Duflo, Esther, William Gale, Jeffrey Liebman, Peter Orszag, and Emmanuel Saez. 2007. “Savings Incentives for Low- and Moderate-Income Families in the United States: Why is the Saver’s Credit Not More Effective?,” 5 *Journal of the European Economic Association*, 647–661.**

**Implementation Costs (per affected individual):** Benartzi et al. (2017) estimate the Duflo et al. (2007) implementation costs in 2005 dollars at $7.60, which they update to $9.27 in 2015 dollars (using a factor of $1.22), and we update to $10.85 in 2021 dollars.

**Effectiveness (change in annual contributions per affected individual):** The increase in tax credit generated an extra $9.50 in contributions, yielding $11.59 in 2015 dollars, which we update to $13.56 in 2021 dollars.

**Uncorrected CE (per $1 change in contributions):** The uncorrected CE is found by dividing the implementation cost by the effectiveness, yielding a result of $0.80.

**Illustrative Non-Transfer Implementation Costs (per affected individual):** Because the implementation cost involved a transfer, it should be excluded. We estimate the non-transfer implementation costs for adjusting the federal tax assessment process at $0.50.

**Corrected CE (excluding transfers) (per $1 change in contributions):** The corrected CE is found by dividing the new implementation cost of $0.50 by the effectiveness, yielding a result of $0.04.

**Table 3: Illustrative Cost-Benefit Analysis of Policies Targeting Energy Conservation**

Note: Most of the figures reported in Table 3 are already calculated in Table 1. We detail below only the additional calculations required for the illustrative CBA here.

**Allcott (2011)**

*Panel A: Net Non-Consumer Welfare*

**Externality Reduction Benefit:** Allcott and Kessler’s (2019) Online Appendix reports an electricity production externality of 22.65% of the average electricity price of $0.125/kWh. Converting this figure to 2021 USD yields an electricity production externality of $0.033/kWh, which we use illustratively in the rest of our analysis. When applied to the effectiveness of Allcott (2011), it yields a result of $7.47.

**Net Non-Consumer Welfare:** The net non-consumer welfare equals the externality reduction benefit minus non-transfer implementation costs and retail net revenue loss, yielding ($10.74).

*Panel B: Consumer Welfare and Net Social Welfare*

**Net Consumer Welfare:** The net consumer welfare is found by subtracting CCs from consumer retail electricity savings, yielding $31.37 or $19.23.

or

**Net Non-Consumer Welfare:** The net non-consumer welfare equals ($10.74), as calculated above.

**Net Social Welfare:**  The net social welfare is found by adding the net consumer and net non-consumer welfares, yielding $20.63 or $8.49.

or

**Asensio and Delmas (2015)**

*Panel A: Net Non-Consumer Welfare*

**Externality Reduction Benefit:** Applying the electricity production externality of $0.033/kWh yields a result of $4.94.

**Net Non-Consumer Welfare:** The net non-consumer welfare equals the externality reduction benefit minus non-transfer implementation costs and retail net revenue loss, yielding a figure of ($3,536.50).

*Panel B: Consumer Welfare and Net Social Welfare*

**Net Consumer Welfare:** The net consumer welfare is found by subtracting the consumer costs from the consumer retail electricity savings, yielding $26 or $16.76.

Or

**Net Social Welfare:** The net social welfare is found by adding the net consumer and net non-consumer welfare, yielding ($3,510.50) or ($3,519.74).

Or

**Ito (2015)**

*Panel A: Net Non-Consumer Welfare*

**Externality Reduction Benefit:** Applying the electricity production externality of $0.033/kWh yields a result of $0.57 overall, $0.10 for coastal, and $5.58 for inland.

Overall:

Coastal:

Inland:

**Net Non-Consumer Welfare:** The net non-consumer welfare equals the externality reduction benefit minus non-transfer implementation costs and retail net revenue loss, yielding ($2.44) overall, ($1.78) coastal, and ($9.55) inland.

Overall:

Coastal:

Inland:

*Panel B: Consumer Welfare and Net Social Welfare*

**Net Consumer Welfare:** The net consumer welfare is found by subtracting the consumer costs from the consumer retail electricity savings, yielding ($0.88) overall, ($3.48) coastal, and $26.82 inland.

Overall:

Coastal:

Inland:

**Net Social Welfare:** The net social welfare is found by adding the net consumer welfare and net non-consumer welfare, yielding ($3.85) overall, ($5.35) coastal, and $12.13 inland.

Overall:

Coastal:

Inland:

**Arimura et al. (2012)**

*Panel A: Net Non-Consumer Welfare*

**Externality Reduction Benefit:** Applying the electricity production externality of $0.033/kWh yields a result of $5.03.

**Net Non-Consumer Welfare:** The net non-consumer welfare equals the externality reduction benefit minus non-transfer implementation costs and retail net revenue loss, yielding ($1.56).

*Panel B: Consumer Welfare and Net Social Welfare*

**Consumer Retail Electricity Savings:** Using the national average residential electricity rates in 1999 (EIA, 2012) of $0.08/kWh and updating from 1999 to 2021, the consumer retail electricity savings are $20.35 in 2021 USD.

**Net Consumer Welfare:** The net consumer welfare is found by subtracting the consumer costs from the consumer retail electricity savings, yielding $11.48.

**Net Social Welfare:** The net social welfare is the sum of net consumer welfare and net non-consumer welfare, yielding a result of $9.92.
